# Supplementary material
Source: PubMed Central journal article supplement (PMC4712027)
Supplement: NIHMS5388-supplement-supplement_1.pdf [file NIHMS5388-supplement-supplement_1.pdf]

Supplementary Table 1. References for CYP2A6 genotyping assay primers

| Assay              | Step            | Primer Name     | Sequence (5' to 3')             | Reference for published primers | Reference for published assays |
|--------------------|-----------------|-----------------|---------------------------------|---------------------------------|--------------------------------|
| *9, *31            | 1 <sup>st</sup> | 2A65Pr1F        | ACCTAGACTTAATCTCCGATAC          | 1 & 2 & 19 & 20                 |                                |
|                    | 1 <sup>st</sup> | 2A6in1R         | CCCAAGACTCTGCTTCTGTGAT          | 19 & 20                         |                                |
| *9, *31            | 2 <sup>nd</sup> | 2A6-460F        | ATCCTCCCAACAGAAGACCCCTAA        | 17 & 19                         |                                |
|                    | 2 <sup>nd</sup> | 2A6-17RA        | ACGGCTGGGGTGGTTGCCTTTA          | 13 & 19                         | *9: 13                         |
| *9                 | 2 <sup>nd</sup> | 2A6-17RC        | ACGGCTGGGGTGGTTGCCTTTC          | 13 & 19                         |                                |
|                    | 2 <sup>nd</sup> | 2A6ex1RW        | CAGCAAGGCCACCAGAAGCAT           | 20                              | *31: 20                        |
| *31                | 2 <sup>nd</sup> | 2A6ex1RV        | CAGCAAGGCCACCAGAAGCAG           | 20                              |                                |
|                    | 1 <sup>st</sup> | 2A61F           | GCTGAACACAGAGCAGATGTACA         | 18                              |                                |
| *2, *24, *25, *26  | 1 <sup>st</sup> | 2A61R           | GGAGGTGACGTGAACGGAAAGA          | 18                              |                                |
| *2, *24, *25       | 2 <sup>nd</sup> | E3R-1           | AACGCCGCGGGTTCCTCGT             | 21                              |                                |
|                    | 2 <sup>nd</sup> | 2A62wfF         | CTCATCGACGCCCT                  | 18                              | *2: 18                         |
| *2                 | 2 <sup>nd</sup> | 2A62v1F         | CTCATCGACGCCCA                  | 18                              |                                |
|                    | 2 <sup>nd</sup> | 2A6ex2Fwt       | GCCACCTTCGACTGGG                | 8                               | *24: 8                         |
| *24                | 2 <sup>nd</sup> | 2A6ex2Fv        | GCCACCTTCGACTGGC                | 8                               |                                |
|                    | 2 <sup>nd</sup> | 2A6in2ex3FW     | CACCTCCCCAGCGGTGTAT             | 8                               | *25: 8                         |
| *25                | 2 <sup>nd</sup> | 2A6in2ex3FV     | CACCTCCCCAGCGGTGTAT             | 8                               |                                |
|                    | 2 <sup>nd</sup> | 2A6ex2Fwt       | GCCACCTTCGACTGGG                | 8                               | *26: 8                         |
| *26                | 2 <sup>nd</sup> | 2A6ex3R1711w    | GCAGGGTGGCGATGGA                | 8                               |                                |
|                    | 2 <sup>nd</sup> | 2A6ex3R1711v    | GCAGGGTGGCGATGGC                | 8                               |                                |
| *20, *23, *27      | 1 <sup>st</sup> | 2A6in3F         | GGCACTGGCGGTGAGCAG              | 2                               |                                |
|                    | 1 <sup>st</sup> | 2A6in5R         | GGCCTGTGTCATCTGCCT              | 2                               |                                |
| *20, *27           | 2 <sup>nd</sup> | 2A6in3F         | CTGCTCTGGAATCTGAC               | 2                               |                                |
|                    | 2 <sup>nd</sup> | 2A6ex42144Rw    | ACAGTGACAGGAACCTCT              | 20                              | *20: 14                        |
| *20                | 2 <sup>nd</sup> | 2A6ex42144Rv    | ACAGTGACAGGAACCTCTG             | 20                              |                                |
|                    | 2 <sup>nd</sup> | 2A6*4171w-M     | GGAAGATTCCTAGCATCCTG            | 8                               | *27: 8                         |
| *27                | 2 <sup>nd</sup> | 2A6*4171v-M     | GGAAGATTCCTAGCATCCTT            | 8                               |                                |
|                    | 2 <sup>nd</sup> | 5M13FOR-H2      | GCA GTT GGC AGG TTG TGG TAG G   | 20                              | *23: 2                         |
| *23                | 2 <sup>nd</sup> | 2A6ex42161Fw-M  | CAA AGA GTT CCT GTC ACT GTC GC  | 20                              |                                |
|                    | 2 <sup>nd</sup> | 2A6ex42161Fv-M  | CAA AGA GTT CCT GTC ACT GTC GT  | 20                              |                                |
| *12, *34           | 1 <sup>st</sup> | 2AinF-L         | GATCTTGGGATGTCAGCTCC            | 19                              |                                |
|                    | 1 <sup>st</sup> | 2A6in5R         | GGCCTGTGTCATCTGCCT              | 2                               |                                |
| *12, *34           | 2 <sup>nd</sup> | 2A6inex5R       | GGGTACCTCTGCATGC                | 19                              |                                |
|                    | 2 <sup>nd</sup> | 2A6in1/ex2      | ACCTCCATCAGATCAGTGAGC           | 19                              | *12: 19                        |
| *12                | 2 <sup>nd</sup> | 2A7in1/ex2      | GCCTCCATCAGTTCAGTGAGT           | 19                              |                                |
|                    | 2 <sup>nd</sup> | 2A6in4F         | CAACCGCCCTCTGCATA               | 19                              | *34: unpublished               |
| *34                | 2 <sup>nd</sup> | 2A7in4F         | CAACCGCCCTCTGCATG               | 19                              | refer to Supplementary Table 2 |
|                    | 1 <sup>st</sup> | 2A6in6F1        | ATTTCTGCTCTGAGACC               | 5                               |                                |
| *1B, *17, *28, *35 | 1 <sup>st</sup> | 2A6R13          | GCCTCCCATAGTGTATAAATAACA        | 11                              |                                |
| *1B                | 2 <sup>nd</sup> | 2A6R12          | ATTGTC TTT CAA AGT AGC TGT GT   | 9                               | *1B: 4                         |
|                    | 2 <sup>nd</sup> | 2A6*1Bwt        | ACT GGG GGC AGG ATG GC          | 5                               |                                |
| *17                | 2 <sup>nd</sup> | 2A6*1Bvar       | AAT GGG GGG AAG ATG CG          | 5                               |                                |
|                    | 2 <sup>nd</sup> | 2A6in7AS        | CTGAGATTCTCTCCCTAT              | 6                               | *17: 6                         |
| *17                | 2 <sup>nd</sup> | 2A6*17Fwt-M     | GAGATCCAAAGATTGGAGCCG           | 20                              |                                |
|                    | 2 <sup>nd</sup> | 2A6*17Fv-M      | GAGATCCAAAGATTGGAGCCA           | 20                              |                                |
| *28                | 2 <sup>nd</sup> | 2A6in7F1        | ACCCACATTAGAAGCTTCTAGA          | 5                               | *28: 8                         |
|                    | 2 <sup>nd</sup> | 2A6ex8R2wt      | TCTTCTAAACTGCCCTTC              | 8                               |                                |
| *28                | 2 <sup>nd</sup> | 2A6ex8R2v       | TCTTCTAAACTGCCCTTG              | 8                               |                                |
|                    | 2 <sup>nd</sup> | 2A6R12          | ATTGTC TTT CAA AGT AGC TGT GT   | 9                               | *35: 10                        |
| *35                | 2 <sup>nd</sup> | 2A6in8ex9F64S8w | TCCTCAGGAAAGCGGA                | 10                              |                                |
|                    | 2 <sup>nd</sup> | 2A6in8ex9F64S8v | TCCTCAGGAAAGCGGT                | 10                              |                                |
| *4H                | 1 <sup>st</sup> | 2Aex7F          | GGC CAA GAT GCC CTA CAT G       | 4                               |                                |
|                    | 1 <sup>st</sup> | 2A6R13          | GCCTCCCATAGTGTATAAATAACA        | 11                              |                                |
| *4H                | 2 <sup>nd</sup> | 2A6R12          | ATTGTC TTT CAA AGT AGC TGT GT   | 9                               | *4H                            |
|                    | 2 <sup>nd</sup> | 2A6in7F1        | ACCCACATTAGAAGCTTCTAGA          | 5                               |                                |
| *4B                | 2 <sup>nd</sup> | 2A7in7F1        | CCCCATTAGAAGCTTCTACTCA          | 8                               |                                |
|                    | 1 <sup>st</sup> | 2A674B-S        | CAAGATATATCCACACTCTATG          | unpublished                     |                                |
| *4B                | 1 <sup>st</sup> | 2A6Rdup         | AATTCCTGGATTGACAAGAG            | 9                               |                                |
|                    | 2 <sup>nd</sup> | 2A6Rdup-2       | ACAAAAGTTGTGCAATAGCA            | unpublished                     | *4B: unpublished               |
| *4B                | 2 <sup>nd</sup> | 2A6FR4.2KS      | GATAAAGAAAATGGATAGAATGG         | unpublished                     | genotyping discussed in 9      |
|                    | 2 <sup>nd</sup> | 2A7FR5.4KS      | GATAAAGAAAATGGATACATTC          | unpublished                     |                                |
| *7, *8, *10        | 1 <sup>st</sup> | 2A6in6F1        | ATTTCTGCTCTGAGACC               | 5                               |                                |
|                    | 1 <sup>st</sup> | 2A6R6           | TAA TTG GGT TGT TTT CTA TTG AGT | 12                              |                                |
| *7                 | 2 <sup>nd</sup> | 2A6R0           | AGGTCATCTAGATTTCTCTACA          | 5                               | *7: 16                         |
|                    | 2 <sup>nd</sup> | 2A6*7Fwt-M      | TCCAGTCACCTAAGGAAAT             | 12                              |                                |
| *8                 | 2 <sup>nd</sup> | 2A6*7Fv-M       | TCCAGTCACCTAAGGAAAC             | 12                              |                                |
|                    | 2 <sup>nd</sup> | 2A6R0           | AGGTCATCTAGATTTCTCTACA          | 2 & 5                           | *8: 16                         |
| *8                 | 2 <sup>nd</sup> | 2A6*8wtF        | GCTTGGCCACGATCCACG              | 16                              |                                |
|                    | 2 <sup>nd</sup> | 2A6*8vF         | GCTTGGCCACGATCCCACT             | 16                              |                                |
| *10                | 2 <sup>nd</sup> | 2A6*7Fwt-M      | TC CCA GTC ACC TAA GGA AAT      | 12                              | *10: 12                        |
|                    | 2 <sup>nd</sup> | 2A6*7Fv-M       | TC CCA GTC ACC TAA GGA AAC      | 12                              |                                |
| *10                | 2 <sup>nd</sup> | 2A6*8Rwt-L      | GGAAGCTCATGGTGTAGTTTC           | 12                              |                                |
|                    | 2 <sup>nd</sup> | 2A6*8Rv-L       | GGAAGCTCATGGTGTAGTTTA           | 12                              |                                |
| *1, *2A            | 1 <sup>st</sup> | 2Aex7F          | GGCCAAGATGCCCTACATG             | 7                               |                                |

| Allele | Position        | Sequence | Frequency                          | Label |
|--------|-----------------|----------|------------------------------------|-------|
| *1x2A  | 1 <sup>st</sup> | 2A7R11   | GTGCAGAGTTTTGTGTGACTG              | 15    |
|        | 2 <sup>nd</sup> | 2A7R12   | TTTGTCTTCCAAAGTAGCTGTGC            | 15    |
|        | 2 <sup>nd</sup> | 2A7in7F1 | CCCCATTAGAAGCTTTCTACTCA            | 8     |
|        | 2 <sup>nd</sup> | 2A6in7F1 | ACCCACATTAGAAGCTTTCTACTAG          | 5     |
| *1x2B  | 1 <sup>st</sup> | 2A6F3    | TAG ACA GAT TCT TAA AAA GCA CCT    | 9     |
|        | 1 <sup>st</sup> | 2A 6/7R  | CTG GAT TCT TGG GCA TTC AAC CA     | 9     |
| *1x2B  | 2 <sup>nd</sup> | 2A6F0    | TGA GTA CAA AAC TTC TAG AAG ATA AT | 9     |
|        | 2 <sup>nd</sup> | 2A6R dup | AAT TCC TGG ATT GAC AAG AG         | 9     |
|        | 2 <sup>nd</sup> | 2A7R dup | AAT TCC TGG ATT GAC GAG AC         | 9     |

**References:**

- Pitarque M, von Richter O, Oke B, Berkkan H, Oscarson M, Ingelman-Sundberg M. 2001. Identification of a single the TATA box of the CYP2A6 gene: impairment of its promoter activity, nucleotide polymorphism in Biochem Biophys Res Commun 284:455-460.
- Ho MK, Mwenifumbo J, Zhao B, Gillam E, Tyndale R. 2008. A novel CYP2A6 allele, CYP2A6\*23, impairs enzyme function in vitro and in vivo and decreases smoking in a population of Black-African descent. Pharmacogenet Genomics 18:67-75.
- Al Koudsi N, Mwenifumbo JC, Sellers EM, Benowitz NL, Swan GE, Tyndale RF. Characterization of the novel CYP2A6\*21 allele using in vivo nicotine kinetics. Eur J Clin Pharmacol. 62(6), 481-484 (2006).
- Oscarson M, McLellan RA, Gullsten H, Yue QY, Lang MA, Bernal ML, Siuues B, Hirvonen A, Raunio H, Pelkonen O, Ingelman-Sundberg M. 1999. Characterisation and PCR-based detection of a CYP2A6 gene deletion found at a high frequency in a Chinese population. FEBS Lett. 448:105-110.
- Mwenifumbo JC, Lessov-Schlagger CN, Zhou Q, Krasnow RE, Swan GE, Benowitz NL, Tyndale RF. 2008. Identification of novel CYP2A6\*18 variants: the CYP2A6\*18 allele is associated with faster in vivo nicotine metabolism. Clin Pharmacol Ther 83:115-121.
- Fukami T, Nakajima M, Yoshida R, Tsuchiya Y, Fujiki Y, Katoh M, McLeod HL, Yokoi T. 2004. A novel polymorphism of human CYP2A6 gene CYP2A6.17 has an amino acid substitution (V365 M) that decreases enzymatic activity in vitro and in vivo. Clin Pharmacol Ther 76:519-527.
- Oscarson M, McLellan RA, Gullsten H, et al: Characterisation and PCR-based detection of a CYP2A6 gene deletion found at a high frequency in a Chinese population. FEBS Lett. 448(1), 105-110 (1999).
- Mwenifumbo JC, Al Koudsi N, Ho MK, et al: Novel and established CYP2A6 alleles impair in vivo nicotine metabolism in a population of Black African descent. Hum Mutat. 29(5), 679-688 (2008).
- Mwenifumbo JC, Zhou Q, Benowitz NL, Sellers EM, Tyndale RF. 2010. New CYP2A6 gene deletion and conversion variants in a population of Black African descent. Pharmacogenomics. 2010 Feb;11(2):189-98.
- Al Koudsi N, Ahluwalia JS, Lin SK, Sellers EM, Tyndale RF. A novel CYP2A6 allele (CYP2A6\*35) resulting in an amino-acid substitution (Asn438Tyr) is associated with lower CYP2A6 activity in vivo. Pharmacogenomics J. 2009 Aug;9(4):274-82.
- Pilliguan M, Zhu AZ, Zhou Q, Benowitz NL, Ahluwalia JS, Sanderson Cox L, Tyndale RF. Novel CYP2A6 variants identified in African Americans are associated with slow nicotine metabolism in vitro and in vivo. Pharmacogenet Genomics. 2014 Feb;24(2):118-28.
- Mwenifumbo JC, Myers MG, Wall TL, Lin SK, Sellers EM, Tyndale RF. Ethnic variation in CYP2A6\*7, CYP2A6\*8 and CYP2A6\*10 as assessed with a novel haplotyping method. Pharmacogenet Genomics. 2005 Mar;15(3):189-92.
- Pitarque M., von Richter, O., Oke, B., Berkkan, H., Oscarson, M., Ingelman-Sundberg, M., 2001. Identification of a single nucleotide polymorphism in the TATA box of the CYP2A6 gene: impairment of its promoter activity. Biochem. Biophys. Res. Commun. 284, 455-460.
- Fukami T, Nakajima M, Higashi E, Yamanaka H, McLeod HL, Yokoi T. A novel CYP2A6\*20 allele found in African-American population produces a truncated protein lacking enzymatic activity. Biochem Pharmacol. 2005 Sep 1;70(5):801-8.
- Rao Y1, Hoffmann E, Zia M, Bodin L, Zeman M, Sellers EM, Tyndale RF. Duplications and defects in the CYP2A6 gene: identification, genotyping, and in vivo effects on smoking. Mol Pharmacol. 2000 Oct;58(4):747-55
- Xu C1, Rao YS, Xu B, Hoffmann E, Jones J, Sellers EM, Tyndale RF. An in vivo pilot study characterizing the new CYP2A6\*7, \*8, and \*10 alleles. Biochem Biophys Res Commun. 2002 Jan 11;290(1):318-24
- Haberl M, Anwald B, Klein K, Weill R, Fuss C, Gepdiremen A, Zanger UM, Meyer UA, Wojnowski L. Three haplotypes associated with CYP2A6 phenotypes in Caucasians. Pharmacogenet Genomics. 2005 Sep;15(9):609-24.
- Oscarson M1, Gullsten H, Rautio A, Bernal ML, Siuues B, Dahl ML, Stenård JH, Pelkonen O, Raunio H, Ingelman-Sundberg M. Genotyping of human cytochrome P450 2A6 (CYP2A6), a nicotine C-oxidase. FEBS Lett. 1998 Nov 6;438(3):201-5
- Schoedel KA1, Hoffmann EB, Rao Y, Sellers EM, Tyndale RF. Ethnic variation in CYP2A6 and association of genetically slow nicotine metabolism and smoking in adult Caucasians. Pharmacogenetics. 2004 Sep;14(9):615-26.
- Wassenaar CA, Ye Y, Cai Q, Aldrich MC, Kneigt J, Spitz MR, Wu X, Blot WJ, Tyndale RF. CYP2A6 reduced activity gene variants confer reduction in lung cancer risk in African American smokers- findings from two independent populations. Carcinogenesis. 2015 Jan;36(1):99-103.
- Gullsten H1, Agúndez JA, Benítez J, Låbrå E, Ladero JM, Diaz-Rubio M, Fernandez-Salguero P, Gonzalez F, Rautio A, Pelkonen O, Raunio H. CYP2A6 gene polymorphism and risk of liver cancer and cirrhosis. Pharmacogenetics. 1997 Jun;7(3):247-50.
- Zhu AZ, Binnington MJ, Renner CC, Lanier AP, Hatsukami DK, Stepanov I, Watson CH, Sosnoff CS, Benowitz NL, Tyndale RF. Alaska Native smokers and smokeless tobacco users with slower CYP2A6 activity have lower tobacco consumption, lower tobacco-specific nitrosamine exposure and lower tobacco-specific nitrosamine bioactivation. Carcinogenesis. 2013 Jan;34(1):93-101.

**Supplementary Table 2.** Previous published versions of *CYP2A6* Endpoint PCR Assay Primers

| Assay <sup>a</sup> | Step            | Previous Primer     | Location           | F/R | Sequence (5' to 3')           | Reason for Change                          |
|--------------------|-----------------|---------------------|--------------------|-----|-------------------------------|--------------------------------------------|
| *23                | 2 <sup>nd</sup> | 2A6in3F             | Intron 3 (1969)    | F   | CTGCCTCCTGGAATTCTGAC          | Reverse primers on top of *27 variant      |
|                    | 2 <sup>nd</sup> | 2A6ex42161AW        | Exon 4 (2182)      | R   | GGAAGATTCTAGCATCATGCG         |                                            |
|                    | 2 <sup>nd</sup> | 2A6ex42161AV        | Exon 4 (2182)      | R   | GGAAGATTCTAGCATCATGCA         |                                            |
| *12                | 1 <sup>st</sup> | 2AF                 | 5' flanking (-238) | F   | GCA CCC CTC CTG AAG TAC CAC   | Modified to accommodate *34 assay          |
|                    | 1 <sup>st</sup> | 2A6ex3R1            | Ex3/In3 (1826)     | R   | GTC CCC TGC TCA CCG CCA       |                                            |
|                    | 2 <sup>nd</sup> | 2A6ex3R2            | Exon 3 (1688)      | R   | CGC TCC CCG TTG CTG AAT A     |                                            |
|                    | 2 <sup>nd</sup> | 2A61F-L             | 5' flanking (-155) | F   | TGG CTG TGT CCC AAG CTA GGC A |                                            |
|                    | 2 <sup>nd</sup> | 2A71F-L             | Exon 1 (351)       | F   | TGG CTG TGT CCC AAG CTA GGT G |                                            |
| *1B                | 1 <sup>st</sup> | 2A6in6F1            | Intron 6 (4892)    | F   | ATTTCTGCTCTGAGACC             | 2A6R11 less specific for <i>CYP2A6</i>     |
|                    | 1 <sup>st</sup> | 2A6R11              | 3' flanking (8515) | R   | CAT CAA GCC CTG CCG TAT       |                                            |
| *17, *28,<br>*35   | 1 <sup>st</sup> | 2A6in6F1            | Intron 6 (4892)    | F   | ATTTCTGCTCTGAGACC             | 2A6R6 close to *4H crossover               |
|                    | 1 <sup>st</sup> | 2A6R6               | 3' flanking (8019) | R   | TAATTGGGTTGTTTTCTATTGAGT      |                                            |
| *35                | 2 <sup>nd</sup> | 2A6R0               | 3' flanking (7783) | R   | AGGTCATCTAGATTTTCTCTACA       | 2A6R0 will not bind if *4H positive sample |
|                    | 2 <sup>nd</sup> | 2A6in8ex9F6458<br>W | In8Ex9 (6443)      | F   | TCCTCAGGAAAGCGGA              |                                            |
|                    | 2 <sup>nd</sup> | 2A6in8ex9F6458<br>V | In8Ex9 (6443)      | F   | TCCTCAGGAAAGCGGT              |                                            |
| *4H                | 1 <sup>st</sup> | 2Aex7F              | Exon 7 (5010)      | F   | GGC CAA GAT GCC CTA CAT G     | 2A6R11 less specific for <i>CYP2A6</i>     |
|                    | 1 <sup>st</sup> | 2A6R11              | 3' flanking (8515) | R   | CAT CAA GCC CTG CCG TAT       |                                            |

a: Refer to Table 1 and Supplementary Table 3 for current assay primers

F: Forward primer; R: Reverse primer

**Supplementary Table 3.** Current Versions of *CYP2A6* Endpoint PCR Assay Primers

| Assay                 | Step            | Primer Name                 | Location            | F/R | Sequence (5' to 3')            |
|-----------------------|-----------------|-----------------------------|---------------------|-----|--------------------------------|
| *9, *31               | 1 <sup>st</sup> | 2A65Pr1F                    | 5' flanking (-1417) | F   | ACCTAGACTTAATCTTCCCGTATAC      |
|                       | 1 <sup>st</sup> | 2A6in1R                     | 5' flanking (324)   | R   | CCCAAGATCCTGTCTTTCTGAT         |
| *9, *31               | 2 <sup>nd</sup> | 2A6-460F                    | 5' flanking (-466)  | F   | ATCCTCCACAACAGAAGACCCCTAA      |
| *9                    | 2 <sup>nd</sup> | 2A6-17RA                    | 5' flanking (-26)   | R   | ACGGCTGGGGTGGTTTGCCTTTA        |
|                       | 2 <sup>nd</sup> | 2A6-17RC                    | 5' flanking (-26)   | R   | ACGGCTGGGGTGGTTTGCCTTTC        |
| *31                   | 2 <sup>nd</sup> | 2A6ex1RW                    | Exon 1 (36)         | R   | CAGCAAGGCCACCAGAAGCAT          |
|                       | 2 <sup>nd</sup> | 2A6ex1RV                    | Exon 1 (36)         | R   | CAGCAAGGCCACCAGAAGCAG          |
| *2, *24,<br>*25, *26  | 1 <sup>st</sup> | 2A61F                       | Exon 1 (144)        | F   | GCTGAACACAGAGCAGATGTACA        |
|                       | 1 <sup>st</sup> | 2A61R                       | Exon 4 (2199)       | R   | GGAGGTTGACGTGAAGTGAAGA         |
| *2, *24,<br>*25       | 2 <sup>nd</sup> | E3R-1                       | Intron 3 (1882)     | R   | AACGCGCGGGTTCCTCGT             |
| *2                    | 2 <sup>nd</sup> | 2A62wtF                     | Exon 3 (1786)       | F   | CTCATCGACGCCCT                 |
|                       | 2 <sup>nd</sup> | 2A62v1F                     | Exon 3 (1786)       | F   | CTCATCGACGCCCA                 |
| *24                   | 2 <sup>nd</sup> | 2A6ex2Fwt                   | Exon 2 (579)        | F   | GCCACCTTCGACTGGG               |
|                       | 2 <sup>nd</sup> | 2A6ex2Fv                    | Exon 2 (579)        | F   | GCCACCTTCGACTGGC               |
| *25                   | 2 <sup>nd</sup> | 2A6in2ex3FW                 | In2/Ex3 (1653)      | F   | CACCTCCCCAGGCGTGGTAT           |
|                       | 2 <sup>nd</sup> | 2A6in2ex3FV                 | In2/Ex3 (1653)      | F   | CACCTCCCCAGGCGTGGTAC           |
| *26                   | 2 <sup>nd</sup> | 2A6ex2Fwt                   | Exon 2 (579)        | F   | GCCACCTTCGACTGGG               |
|                       | 2 <sup>nd</sup> | 2A6ex3R1711w                | Exon 3 (1726)       | R   | GCAGGGTGGCGATGGA               |
|                       | 2 <sup>nd</sup> | 2A6ex3R1711v                | Exon 3 (1726)       | R   | GCAGGGTGGCGATGGC               |
| *20, *23,<br>*27      | 1 <sup>st</sup> | 2A6exin3F                   | Ex3/In3(1804)       | F   | GGCACTGGCGGTGAGCAG             |
|                       | 1 <sup>st</sup> | 2A6in5R                     | Intron 5 (3638)     | R   | GGCCTGTGTCATCTGCCT             |
| *20, *27              | 2 <sup>nd</sup> | 2A6in3F                     | Intron 3 (1969)     | F   | CTGCCTCCTGGAATTCTGAC           |
| *20                   | 2 <sup>nd</sup> | 2A6ex42144Rw                | Exon 4 (2158)       | R   | ACAGTGACAGGAACCTCTT            |
|                       | 2 <sup>nd</sup> | 2A6ex42144Rv                | Exon 4 (2158)       | R   | ACAGTGACAGGAACCTCTG            |
| *27                   | 2 <sup>nd</sup> | 2A6*4171w-M <sup>a</sup>    | Exon 4 (2182)       | R   | GGAAGATTCCTAGCATCCTG           |
|                       | 2 <sup>nd</sup> | 2A6*4171v-M <sup>a</sup>    | Exon 4 (2182)       | R   | GGAAGATTCCTAGCATCCTT           |
| *23                   | 2 <sup>nd</sup> | 5M13FOR-H2                  | Intron 4 (2260)     | R   | GCA GTT GGC AGG TTG TGG TAG G  |
|                       | 2 <sup>nd</sup> | 2A6ex42161Fw-M <sup>i</sup> | Exon 4 (2139)       | F   | CAA AGA GTT CCT GTC ACT GTC GC |
|                       | 2 <sup>nd</sup> | 2A6ex42161Fv-M <sup>i</sup> | Exon 4 (2139)       | F   | CAA AGA GTT CCT GTC ACT GTC GT |
| *12, *34              | 1 <sup>st</sup> | 2AinIF-L                    | Intron 1 (316)      | F   | GATCTTGGGATGTCCAGCTCC          |
|                       | 1 <sup>st</sup> | 2A6in5R                     | Intron 5 (3638)     | R   | GGCCTGTGTCATCTGCCT             |
| *12, *34              | 2 <sup>nd</sup> | 2A6inex5R                   | Ex5/In5(3559)       | R   | GGTGTACCTCCTGCATGC             |
| *12                   | 2 <sup>nd</sup> | 2A6in1/ex2                  | In1/In2(436)        | F   | ACCTCCATCAGATCAGTGAGC          |
|                       | 2 <sup>nd</sup> | 2A7in1/ex2                  | In1/In2(954)        | F   | GCCTCCATCAGTTCAGTGAGT          |
| *34                   | 2 <sup>nd</sup> | 2A6in4F                     | Intron 4 (2573)     | F   | CAACCGGCTCCTGCATA              |
|                       | 2 <sup>nd</sup> | 2A7in4F                     | Intron 4 (2977)     | F   | CAACCCGCTCCTGCATG              |
| *1B, *17,<br>*28, *35 | 1 <sup>st</sup> | 2A6in6F1                    | Intron 6 (4892)     | F   | ATTTCTGCTCTGAGACC              |
|                       | 1 <sup>st</sup> | 2A6R13                      | 3' flanking (8548)  | R   | GCCTCCCATAGTGCTATAATTAACA      |
| *1B                   | 2 <sup>nd</sup> | 2A6R12                      | 3' flanking (8278)  | R   | ATT GTC TTT CAA AGT AGC TGT GT |
|                       | 2 <sup>nd</sup> | 2A6*1Bwt                    | 3' flanking (6719)  | F   | ACT GGG GGC AGG ATG GC         |
|                       | 2 <sup>nd</sup> | 2A6*1Bvar                   | 3' flanking (7110)  | F   | AAT GGG GGG AAG ATG CG         |
| *17                   | 2 <sup>nd</sup> | 2A6in7AS                    | Intron 7 (5426)     | R   | CTGAGATTTCTGTCCCTAT            |
|                       | 2 <sup>nd</sup> | 2A6*17Fwt-M <sup>a</sup>    | Exon 7 (5044)       | F   | GAGATCCAAAGATTTGGAGCCG         |
|                       | 2 <sup>nd</sup> | 2A6*17Fv-M <sup>a</sup>     | Exon 7 (5044)       | F   | GAGATCCAAAGATTTGGAGCCA         |
| *28                   | 2 <sup>nd</sup> | 2A6in7F1                    | Intron 7 (5200)     | F   | ACCCACATTAGAAGCTTTCTAGA        |
|                       | 2 <sup>nd</sup> | 2A6ex8R2wt                  | Exon 8 (5769)       | R   | TCTTCTTAAACTGCCCTTC            |
|                       | 2 <sup>nd</sup> | 2A6ex8R2v                   | Exon 8 (5769)       | R   | TCTTCTTAAACTGCCCTTG            |
|                       | 2 <sup>nd</sup> | 2A6R12                      | 3' flanking (8278)  | R   | ATT GTC TTT CAA AGT AGC TGT GT |

|             |                 |                         |                     |   |                                    |
|-------------|-----------------|-------------------------|---------------------|---|------------------------------------|
| *35         | 2 <sup>nd</sup> | 2A6in8ex9F6458<br>w     | In8Ex9 (6443)       | F | TCCTCAGGAAAGCGGA                   |
|             | 2 <sup>nd</sup> | 2A6in8ex9F6458v         | In8Ex9 (6443)       | F | TCCTCAGGAAAGCGGT                   |
| *4H         | 1 <sup>st</sup> | 2Aex7F                  | Exon 7 (5010)       | F | GGC CAA GAT GCC CTA CAT G          |
|             | 1 <sup>st</sup> | 2A6R13                  | 3' flanking (8548)  | R | GCCTCCCATAGTGCTATAATTAACA          |
| *4H         | 2 <sup>nd</sup> | 2A6R12                  | 3' flanking (8278)  | R | ATTGTCTTTCAAAGTAGCTGTGT            |
|             | 2 <sup>nd</sup> | 2A6in7F1                | Intron 7 (5200)     | F | ACCCACATTAGAAGCTTTCTAGA            |
|             | 2 <sup>nd</sup> | 2A7in7F1                | Intron 7 (5594)     | F | CCCCATTAGAAGCTTTCTACTCA            |
| *4B         | 1 <sup>st</sup> | 2A6/74B-S               | 3' flanking (10679) | F | CAAGATATATCCACACTCCTATG            |
|             | 1 <sup>st</sup> | 2A6Rdup                 | 3' flanking (13776) | R | AATTCCTGGATTGACAAGAG               |
| *4B         | 2 <sup>nd</sup> | 2A6Rdup-2               | 3' flanking (13216) | R | ACAAAAGTTGTGCAATAGCA               |
|             | 2 <sup>nd</sup> | 2A6FR4.2KS              | 3' flanking (10770) | F | GATAAAGAAAATGTGGATAGAATGG          |
|             | 2 <sup>nd</sup> | 2A7FR5.4KS              | 3' flanking (12450) | F | GATAAAGAAAATGTGGTACATTC            |
| *7, *8, *10 | 1 <sup>st</sup> | 2A6in6F1                | Intron 6 (4892)     | F | ATTTCTGCTCTGAGACC                  |
|             | 1 <sup>st</sup> | 2A6R6                   | 3' flanking (8019)  | R | TAA TTG GGT TGT TTT CTA TTG AGT    |
| *7          | 2 <sup>nd</sup> | 2A6R0                   | 3' flanking (7783)  | R | AGGTCATCTAGATTTTCTCCTACA           |
|             | 2 <sup>nd</sup> | 2A6*7Fwt-M <sup>a</sup> | Exon 9 (6539)       | F | TCCCAGTCACCTAAGGA <u>AT</u>        |
|             | 2 <sup>nd</sup> | 2A6*7Fv-M <sup>a</sup>  | Exon 9 (6539)       | F | TCCCAGTCACCTAAGGA <u>AC</u>        |
| *8          | 2 <sup>nd</sup> | 2A6R0                   | 3' flanking (7783)  | R | AGGTCATCTAGATTTTCTCCTACA           |
|             | 2 <sup>nd</sup> | 2A6*8wtF                | Exon 9 (6582)       | F | GCTTTGCCACGATCCCACG                |
|             | 2 <sup>nd</sup> | 2A6*8vF                 | Exon 9 (6582)       | F | GCTTTGCCACGATCCCAC                 |
| *10         | 2 <sup>nd</sup> | 2A6*7Fwt-M <sup>a</sup> | Exon 9 (6539)       | F | TC CCA GTC ACC TAA GGA <u>AT</u>   |
|             | 2 <sup>nd</sup> | 2A6*7Fv-M <sup>a</sup>  | Exon 9 (6539)       | F | TC CCA GTC ACC TAA GGA <u>AC</u>   |
|             | 2 <sup>nd</sup> | 2A6*8Rwt-L              | Exon 9 (6620)       | R | GGAAGCTCATGGTGTAGTTTC              |
|             | 2 <sup>nd</sup> | 2A6*8Rv-L               | Exon 9 (6620)       | R | GGAAGCTCATGGTGTAGTTTA              |
| *1x2A       | 1 <sup>st</sup> | 2Aex7F                  | Exon 7 (5010)       | F | GGCCAAGATGCCCTACATG                |
|             | 1 <sup>st</sup> | 2A7R11                  | 3' flanking (8800)  | R | GTGCAGAGGTTTTTGTGTGACTG            |
| *1x2A       | 2 <sup>nd</sup> | 2A7R12                  | 3' flanking (8687)  | R | TTTGTCTTCCAAAGTAGCTGTGC            |
|             | 2 <sup>nd</sup> | 2A7in7F1                | Intron 7 (5594)     | F | CCCCATTAGAAGCTTTCTACTCA            |
|             | 2 <sup>nd</sup> | 2A6in7F1                | Intron 7 (5200)     | F | ACCCACATTAGAAGCTTTCTAGA            |
| *1x2B       | 1 <sup>st</sup> | 2A6F3                   | 3' flanking (7076)  | F | TAG ACA GAT TCT TAA AAA GCA CCT    |
|             | 1 <sup>st</sup> | 2A 6/7R                 | 3' flanking (13821) | R | CTG GAT TCT TGG GCA TTC AAC CCA    |
| *1x2B       | 2 <sup>nd</sup> | 2A6F0                   | 3' flanking (7735)  | F | TGA GTA CAA AAC TTC TAG AAG ATA AT |
|             | 2 <sup>nd</sup> | 2A6R dup                | 3' flanking (13776) | R | AAT TCC TGG ATT GAC AAG AG         |
|             | 2 <sup>nd</sup> | 2A7R dup                | 3' flanking (15131) | R | AAT TCC TGG ATT GAC GAG AC         |

a: Mismatch primer at third position from 3' end, underlined in sequence

F: Forward primer; R: Reverse primer

**Supplementary Table 4.** Concordance between endpoint (Method 1) and SYBR green (Method 2) genotyping assays

|                  | SYBR green (Method 2) |                                                    | Endpoint PCR (Method 1) |                                                | Concordance       | Number of Samples <sup>b</sup> | Number of Datasets <sup>c</sup> |
|------------------|-----------------------|----------------------------------------------------|-------------------------|------------------------------------------------|-------------------|--------------------------------|---------------------------------|
|                  | 1st amp primers       | 2nd amp primers                                    | 1st amp primers         | 2nd amp primers                                |                   |                                |                                 |
| <i>CYP2A6*9</i>  | 2A65Pr1F<br>2A6in5R   | 2A6*9wtR-Sybr-M<br>2A6*9vR-Sybr-M<br>125M13BEV-B   | 2A65Pr1F<br>2A6in1R     | 2A6-460F<br>2A6-17RA<br>2A6-17RC               | 100% <sup>a</sup> | 189                            | 2 sets                          |
| <i>CYP2A6*31</i> | 2A65Pr1F<br>2A6in5R   | 2A6*31wtR-Sybr<br>2A6*31vR-Sybr<br>2A61F-L         | 2A65Pr1F<br>2A6in1R     | 2A6-460F<br>2A6ex1Rw<br>2A6ex1Rv               | 100% <sup>a</sup> | 92                             | 5 sets                          |
| <i>CYP2A6*24</i> | 2A65Pr1F<br>2A6in5R   | 2A6*24wtR-Sybr-M<br>2A6*24vR-Sybr-M<br>2A6ex2-505F | 2A61F<br>2A61R          | 2Aex2Fwt<br>2Aex2Fv<br>E3R-1                   | 100% <sup>a</sup> | 23                             | 3 sets                          |
| <i>CYP2A6*20</i> | 2A65Pr1F<br>2A6in5R   | 2A6*20wtR-sybr-M<br>2A6*20vtR-sybr-M<br>2A6in3F-L  | 2A6exin3F<br>2A6in5R    | 2A6in3F<br>2A6ex42144Rw<br>2A6ex42144Rv        | 100% <sup>a</sup> | 49                             | 5 sets                          |
| <i>CYP2A6*23</i> | 2A65Pr1F<br>2A6in5R   | 2A6ex42161Fw-M<br>2A6ex42161Fv-M-L<br>5M13FOR-H2   | 2A6exin3F<br>2A6in5R    | 2A6ex42161Fw-M<br>2A6ex42161Fv-M<br>5M13FOR-H2 | 100% <sup>a</sup> | 16                             | 3 sets                          |
| <i>CYP2A6*17</i> | 2A6in6F1<br>2A6R13    | 2A6*17Fwt-Sybr-M<br>2A6*17Fv-Sybr-M<br>2A6in7-17R2 | 2A6in6F1<br>2A6R13      | 2A6*17Fwt-M<br>2A6*17Fv-M<br>2A6in7AS          | 100%              | 127                            | 5 sets                          |
| <i>CYP2A6*35</i> | 2A6in6F1<br>2A6R13    | 2A6*35wtR-Sybr<br>2A6*35vR-Sybr<br>2A6in8-6395F    | 2A6in6F1<br>2A6R13      | 2A6in8ex9F6458w<br>2A6in8ex9F6458v<br>2A6R12   | 100%              | 119                            | 5 sets                          |
| <i>CYP2A6*12</i> | 2Ain1F-L<br>2A6in5R   | 2A6in1/ex2-L<br>2A7in1/ex2-L<br>2A6R-667           | 2AinF-L<br>2A6in5R      | 2A6in/ex2<br>2A7in/ex2<br>2A6inex5R            | 100%              | 16                             | 3 sets                          |
| <i>CYP2A6*34</i> | 2Ain1F-L<br>2A6in5R   | 2A6-2572F<br>2A7-2978F<br>2A6-2862R                | 2AinF-L<br>2A6in5R      | 2A6in4F<br>2A7in4F<br>2A6inex5R                | 100%              | 16                             | 3 sets                          |
| <i>CYP2A6*1B</i> | 2A6in6F1<br>2A6R13    | 2A6*1Bwt<br>2A6*1Bvar-L<br>2A6R6944                | 2A6in6F1<br>2A6R13      | 2A6*1Bwt<br>2A6*1Bvar<br>2A6R12                | 100%              | 35                             | 2 sets                          |

a: SYBR green assays also tested in novel population of ~200 African Americans and ~200 European Americans and genotypes found to be in Hardy-Weinberg Equilibrium

b: All samples were from de-identified DNA datasets acquired with ethical approval from University of Toronto's IRB.

c: Number of unique datasets that samples were drawn from to test concordance
